# Supplementary material for: The Genetics of Bene Israel from India Reveals Both Substantial Jewish and Indian Ancestry
Source: PLOS journal article supplement (doi:10.1371/journal.pone.0152056), 2016-03-24
Supplement: S20 (10.1371/journal.pone.0152056.s020) [file journal.pone.0152056.s020]

**Table S6. mtDNA haplogroups of Bene Israel samples used in this study**

| <b>Haplogroup</b> | <b><i>No. of<br/>Samples (%)</i></b> |
|-------------------|--------------------------------------|
| M39               | <i>10 (44.4%)</i>                    |
| M30               | <i>3 (16.7%)</i>                     |
| H                 | <i>3 (16.7%)</i>                     |
| M                 | <i>2 (11.1%)</i>                     |

mtDNA haplogroup assignment is based on HaploGrep classification.
